# Supplementary material for: Asthma-Related Health Outcomes Associated with Short-Acting β2-Agonist Inhaler Use: An Observational UK Study as Part of the SABINA Global Program
Source: Springer Nature journal article supplement (doi:10.1007/s12325-020-01444-5), 2020-07-27
Supplement: MOESM1 [file 18219414]

## SUPPLEMENTARY MATERIAL

### Supplementary Tables

**Table S1** Association between exacerbation rates and demographic and clinical characteristics in asthma patients at BTS treatment steps 1/2 after excluding patients with COPD co-diagnosis

| Characteristic                                                                                                                                                                                                                                                                                                                                                                                                                                                                                        | Adjusted <sup>a</sup> HR | 95% CI      |
|-------------------------------------------------------------------------------------------------------------------------------------------------------------------------------------------------------------------------------------------------------------------------------------------------------------------------------------------------------------------------------------------------------------------------------------------------------------------------------------------------------|--------------------------|-------------|
| <b>SABA inhaler use<sup>b</sup></b>                                                                                                                                                                                                                                                                                                                                                                                                                                                                   |                          |             |
| Low use                                                                                                                                                                                                                                                                                                                                                                                                                                                                                               | <i>Reference</i>         |             |
| High use                                                                                                                                                                                                                                                                                                                                                                                                                                                                                              | 1.22                     | 1.18–1.26   |
| <b>Sex</b>                                                                                                                                                                                                                                                                                                                                                                                                                                                                                            |                          |             |
| Male                                                                                                                                                                                                                                                                                                                                                                                                                                                                                                  | <i>Reference</i>         |             |
| Female                                                                                                                                                                                                                                                                                                                                                                                                                                                                                                | 1.30                     | 1.26–1.35   |
| <b>Age group (years)</b>                                                                                                                                                                                                                                                                                                                                                                                                                                                                              |                          |             |
| 12–17                                                                                                                                                                                                                                                                                                                                                                                                                                                                                                 | <i>Reference</i>         |             |
| 18–55                                                                                                                                                                                                                                                                                                                                                                                                                                                                                                 | 1.45                     | 1.38–1.53   |
| >55                                                                                                                                                                                                                                                                                                                                                                                                                                                                                                   | 2.69                     | 2.54–2.85   |
| <b>Body mass index (kg/m<sup>2</sup>)</b>                                                                                                                                                                                                                                                                                                                                                                                                                                                             |                          |             |
| Normal (18.5–25)                                                                                                                                                                                                                                                                                                                                                                                                                                                                                      | <i>Reference</i>         |             |
| Underweight (<18.5)                                                                                                                                                                                                                                                                                                                                                                                                                                                                                   | 1.21                     | 1.10–1.34   |
| Overweight (25–30)                                                                                                                                                                                                                                                                                                                                                                                                                                                                                    | 1.08                     | 1.04–1.12   |
| Obese (≥30)                                                                                                                                                                                                                                                                                                                                                                                                                                                                                           | 1.23                     | 1.18–1.28   |
| <b>Socioeconomic status (IMD)</b>                                                                                                                                                                                                                                                                                                                                                                                                                                                                     |                          |             |
| 1                                                                                                                                                                                                                                                                                                                                                                                                                                                                                                     | <i>Reference</i>         |             |
| 2                                                                                                                                                                                                                                                                                                                                                                                                                                                                                                     | 1.13                     | 1.07–1.19   |
| 3                                                                                                                                                                                                                                                                                                                                                                                                                                                                                                     | 1.18                     | 1.12–1.25   |
| 4                                                                                                                                                                                                                                                                                                                                                                                                                                                                                                     | 1.19                     | 1.13–1.26   |
| 5                                                                                                                                                                                                                                                                                                                                                                                                                                                                                                     | 1.23                     | 1.17–1.29   |
| <b>Smoking history</b>                                                                                                                                                                                                                                                                                                                                                                                                                                                                                |                          |             |
| Never                                                                                                                                                                                                                                                                                                                                                                                                                                                                                                 | <i>Reference</i>         |             |
| Current smoker                                                                                                                                                                                                                                                                                                                                                                                                                                                                                        | 1.48                     | 1.42–1.54   |
| Ex-smoker                                                                                                                                                                                                                                                                                                                                                                                                                                                                                             | 1.14                     | 1.10–1.19   |
| <b>ICS use (BDP equivalent)</b>                                                                                                                                                                                                                                                                                                                                                                                                                                                                       |                          |             |
| No ICS                                                                                                                                                                                                                                                                                                                                                                                                                                                                                                | <i>Reference</i>         |             |
| Low dose (400–799 µg/day)                                                                                                                                                                                                                                                                                                                                                                                                                                                                             | 1.06                     | 1.02–1.09   |
| <b>Exacerbations</b>                                                                                                                                                                                                                                                                                                                                                                                                                                                                                  |                          |             |
| None                                                                                                                                                                                                                                                                                                                                                                                                                                                                                                  | <i>Reference</i>         |             |
| 1                                                                                                                                                                                                                                                                                                                                                                                                                                                                                                     | 2.89                     | 2.76–3.02   |
| 2                                                                                                                                                                                                                                                                                                                                                                                                                                                                                                     | 5.21                     | 4.80–5.65   |
| ≥3                                                                                                                                                                                                                                                                                                                                                                                                                                                                                                    | 20.86                    | 19.48–22.30 |
| <b>Atopy</b>                                                                                                                                                                                                                                                                                                                                                                                                                                                                                          | 1.00                     | 0.97–1.03   |
| <b>Depression</b>                                                                                                                                                                                                                                                                                                                                                                                                                                                                                     | 1.15                     | 1.10–1.20   |
| <b>Anxiety</b>                                                                                                                                                                                                                                                                                                                                                                                                                                                                                        | 1.08                     | 1.03–1.12   |
| <b>Reflux disease</b>                                                                                                                                                                                                                                                                                                                                                                                                                                                                                 | 1.24                     | 1.18–1.31   |
| <b>Pneumonia</b>                                                                                                                                                                                                                                                                                                                                                                                                                                                                                      | 1.28                     | 1.18–1.39   |
| <p><i>BDP</i> beclomethasone dipropionate, <i>BTS</i> British Thoracic Society, <i>CI</i> confidence interval, <i>COPD</i> chronic obstructive pulmonary disease, <i>HR</i> hazard ratio, <i>ICS</i> inhaled corticosteroids, <i>IMD</i> Index of Multiple Deprivation, <i>SABA</i> short-acting β<sub>2</sub>-agonists</p> <p><sup>a</sup>The model was adjusted by all the variables shown in the table.</p> <p><sup>b</sup>Low use: 0–2 SABA canisters/year; high use: ≥3 SABA canisters/year.</p> |                          |             |

**Table S2** Association between exacerbation rates and demographic and clinical characteristics in asthma patients at BTS treatment steps 3–5 after excluding patients with COPD co-diagnosis

| Characteristics                                                                                                                                                                                                                                                                                                                                                                                        | Adjusted <sup>a</sup> HR | 95% CI    |
|--------------------------------------------------------------------------------------------------------------------------------------------------------------------------------------------------------------------------------------------------------------------------------------------------------------------------------------------------------------------------------------------------------|--------------------------|-----------|
| <b>SABA inhaler use<sup>b</sup></b>                                                                                                                                                                                                                                                                                                                                                                    |                          |           |
| Low use                                                                                                                                                                                                                                                                                                                                                                                                | <i>Reference</i>         |           |
| High use                                                                                                                                                                                                                                                                                                                                                                                               | 1.27                     | 1.23–1.31 |
| <b>Sex</b>                                                                                                                                                                                                                                                                                                                                                                                             |                          |           |
| Male                                                                                                                                                                                                                                                                                                                                                                                                   | <i>Reference</i>         |           |
| Female                                                                                                                                                                                                                                                                                                                                                                                                 | 1.13                     | 1.10–1.16 |
| <b>Age group (years)</b>                                                                                                                                                                                                                                                                                                                                                                               |                          |           |
| 12–17                                                                                                                                                                                                                                                                                                                                                                                                  | <i>Reference</i>         |           |
| 18–55                                                                                                                                                                                                                                                                                                                                                                                                  | 1.10                     | 1.02–1.18 |
| >55                                                                                                                                                                                                                                                                                                                                                                                                    | 1.74                     | 1.62–1.87 |
| <b>Body mass index (kg/m<sup>2</sup>)</b>                                                                                                                                                                                                                                                                                                                                                              |                          |           |
| Normal (18.5–25)                                                                                                                                                                                                                                                                                                                                                                                       | <i>Reference</i>         |           |
| Underweight (<18.5)                                                                                                                                                                                                                                                                                                                                                                                    | 1.14                     | 1.05–1.23 |
| Overweight (25–30)                                                                                                                                                                                                                                                                                                                                                                                     | 0.99                     | 0.96–1.03 |
| Obese (≥30)                                                                                                                                                                                                                                                                                                                                                                                            | 1.02                     | 0.98–1.05 |
| <b>Socioeconomic status (IMD)</b>                                                                                                                                                                                                                                                                                                                                                                      |                          |           |
| 1                                                                                                                                                                                                                                                                                                                                                                                                      | <i>Reference</i>         |           |
| 2                                                                                                                                                                                                                                                                                                                                                                                                      | 1.05                     | 1.00–1.10 |
| 3                                                                                                                                                                                                                                                                                                                                                                                                      | 1.12                     | 1.07–1.17 |
| 4                                                                                                                                                                                                                                                                                                                                                                                                      | 1.09                     | 1.05–1.14 |
| 5                                                                                                                                                                                                                                                                                                                                                                                                      | 1.11                     | 1.06–1.15 |
| <b>Smoking history</b>                                                                                                                                                                                                                                                                                                                                                                                 |                          |           |
| Never                                                                                                                                                                                                                                                                                                                                                                                                  | <i>Reference</i>         |           |
| Current smoker                                                                                                                                                                                                                                                                                                                                                                                         | 1.29                     | 1.24–1.34 |
| Ex-smoker                                                                                                                                                                                                                                                                                                                                                                                              | 1.16                     | 1.12–1.19 |
| <b>ICS use (BDP equivalent)</b>                                                                                                                                                                                                                                                                                                                                                                        |                          |           |
| Low dose (400–799 µg/day)                                                                                                                                                                                                                                                                                                                                                                              | <i>Reference</i>         |           |
| Medium dose (800–1599 µg/day)                                                                                                                                                                                                                                                                                                                                                                          | 1.18                     | 1.14–1.22 |
| High dose (≥1600 µg/day)                                                                                                                                                                                                                                                                                                                                                                               | 1.48                     | 1.42–1.54 |
| <b>PDC</b>                                                                                                                                                                                                                                                                                                                                                                                             |                          |           |
| Lowest tertile (0.3%–17%)                                                                                                                                                                                                                                                                                                                                                                              | <i>Reference</i>         |           |
| Middle tertile (17%–42%)                                                                                                                                                                                                                                                                                                                                                                               | 1.04                     | 1.00–1.08 |
| Highest tertile (42%–100%)                                                                                                                                                                                                                                                                                                                                                                             | 1.20                     | 1.15–1.25 |
| <b>Exacerbations</b>                                                                                                                                                                                                                                                                                                                                                                                   |                          |           |
| None                                                                                                                                                                                                                                                                                                                                                                                                   | <i>Reference</i>         |           |
| 1                                                                                                                                                                                                                                                                                                                                                                                                      | 2.16                     | 2.09–2.22 |
| 2                                                                                                                                                                                                                                                                                                                                                                                                      | 3.28                     | 3.15–3.41 |
| ≥3                                                                                                                                                                                                                                                                                                                                                                                                     | 6.91                     | 6.61–7.22 |
| <b>Atopy</b>                                                                                                                                                                                                                                                                                                                                                                                           | 1.01                     | 0.98–1.03 |
| <b>Depression</b>                                                                                                                                                                                                                                                                                                                                                                                      | 1.08                     | 1.05–1.12 |
| <b>Anxiety</b>                                                                                                                                                                                                                                                                                                                                                                                         | 1.03                     | 1.00–1.07 |
| <b>Reflux disease</b>                                                                                                                                                                                                                                                                                                                                                                                  | 1.08                     | 1.04–1.12 |
| <b>Pneumonia</b>                                                                                                                                                                                                                                                                                                                                                                                       | 1.21                     | 1.15–1.27 |
| <i>BDP</i> beclomethasone dipropionate, <i>BTS</i> British Thoracic Society, <i>CI</i> confidence interval, <i>COPD</i> chronic obstructive pulmonary disease, <i>HR</i> hazard ratio, <i>ICS</i> inhaled corticosteroids, <i>IMD</i> Index of Multiple Deprivation, <i>SABA</i> short-acting β <sub>2</sub> -agonists<br><sup>a</sup> The model was adjusted by all the variables shown in the table. |                          |           |

<sup>b</sup>Low use: 0–2 SABA canisters/year; high use:  $\geq 3$  SABA canisters/year.

**Table S3** Association between exacerbation rates and demographic and clinical characteristics in asthma patients at BTS treatment steps 1/2 after excluding patients not on SABA during the baseline year

| SABA inhaler use<br>(canisters/year)                                                                                                                                                                                                                                                                                                                                                                                     | Adjusted <sup>a</sup> HR | 95% CI    |
|--------------------------------------------------------------------------------------------------------------------------------------------------------------------------------------------------------------------------------------------------------------------------------------------------------------------------------------------------------------------------------------------------------------------------|--------------------------|-----------|
| 1–2                                                                                                                                                                                                                                                                                                                                                                                                                      | <i>Reference</i>         |           |
| ≥3                                                                                                                                                                                                                                                                                                                                                                                                                       | 1.20                     | 1.14–1.27 |
| <p><i>BTS</i> British Thoracic Society, <i>CI</i> confidence interval, <i>HR</i> hazard ratio, <i>SABA</i> short-acting β<sub>2</sub>-agonists<br/> <sup>a</sup>Adjusted for inhaled corticosteroid use, age, gender, body mass index, socioeconomic status, smoking, exacerbations in the previous year, pneumonia, atopy, gastroesophageal reflux, chronic obstructive pulmonary disease, anxiety, and depression.</p> |                          |           |

**Table S4** Association between exacerbation rates and demographic and clinical characteristics in asthma patients at BTS treatment steps 1/2 who were also prescribed ICS

| Characteristic                                                                                                                                                                                        | Adjusted HR <sup>a</sup> | 95% CI      |
|-------------------------------------------------------------------------------------------------------------------------------------------------------------------------------------------------------|--------------------------|-------------|
| <b>SABA inhaler use</b>                                                                                                                                                                               |                          |             |
| Low use                                                                                                                                                                                               | <i>Reference</i>         |             |
| High use                                                                                                                                                                                              | 1.17                     | 1.11–1.24   |
| <b>PDC</b>                                                                                                                                                                                            |                          |             |
| Lowest tertile (0.3%–17%)                                                                                                                                                                             | <i>Reference</i>         |             |
| Middle tertile (17%–42%)                                                                                                                                                                              | 1.06                     | 1.00–1.11   |
| Highest tertile (42%–100%)                                                                                                                                                                            | 1.25                     | 1.17–1.34   |
| <b>Age groups (years)</b>                                                                                                                                                                             |                          |             |
| 12–17                                                                                                                                                                                                 | <i>Reference</i>         |             |
| 18–55                                                                                                                                                                                                 | 1.38                     | 1.28–1.48   |
| >55                                                                                                                                                                                                   | 2.32                     | 2.14–2.51   |
| <b>Sex</b>                                                                                                                                                                                            |                          |             |
| Male                                                                                                                                                                                                  | <i>Reference</i>         |             |
| Female                                                                                                                                                                                                | 1.29                     | 1.23–1.35   |
| <b>BMI (kg/m<sup>2</sup>)</b>                                                                                                                                                                         |                          |             |
| Normal (18.5–25)                                                                                                                                                                                      | <i>Reference</i>         |             |
| Underweight (<18.5)                                                                                                                                                                                   | 1.27                     | 1.12–1.43   |
| Overweight (25–30)                                                                                                                                                                                    | 1.08                     | 1.02–1.14   |
| Obese (≥30)                                                                                                                                                                                           | 1.20                     | 1.14–1.27   |
| <b>Socioeconomic status (IMD)</b>                                                                                                                                                                     |                          |             |
| 1                                                                                                                                                                                                     | <i>Reference</i>         |             |
| 2                                                                                                                                                                                                     | 1.12                     | 1.04–1.20   |
| 3                                                                                                                                                                                                     | 1.14                     | 1.06–1.22   |
| 4                                                                                                                                                                                                     | 1.15                     | 1.07–1.23   |
| 5                                                                                                                                                                                                     | 1.17                     | 1.10–1.25   |
| <b>Smoking history</b>                                                                                                                                                                                |                          |             |
| Never                                                                                                                                                                                                 | <i>Reference</i>         |             |
| Current                                                                                                                                                                                               | 1.43                     | 1.35–1.52   |
| Ex-smoker                                                                                                                                                                                             | 1.10                     | 1.05–1.16   |
| <b>Exacerbations</b>                                                                                                                                                                                  |                          |             |
| None                                                                                                                                                                                                  | <i>Reference</i>         |             |
| 1                                                                                                                                                                                                     | 2.68                     | 2.53–2.83   |
| 2                                                                                                                                                                                                     | 4.60                     | 4.21–5.04   |
| ≥3                                                                                                                                                                                                    | 16.30                    | 14.90–17.90 |
| <b>Pneumonia</b>                                                                                                                                                                                      | 1.25                     | 1.12–1.39   |
| <b>Atopy</b>                                                                                                                                                                                          | 1.00                     | 0.96–1.04   |
| <b>Reflux</b>                                                                                                                                                                                         | 1.21                     | 1.13–1.29   |
| <b>COPD</b>                                                                                                                                                                                           | 1.47                     | 1.35–1.61   |
| <b>Anxiety</b>                                                                                                                                                                                        | 1.05                     | 1.00–1.12   |
| <b>Depression</b>                                                                                                                                                                                     | 1.15                     | 1.09–1.21   |
| <i>CI</i> confidence interval, <i>COPD</i> chronic obstructive pulmonary disease, <i>HR</i> hazard ratio, <i>IMD</i> Index of Multiple Deprivation, <i>SABA</i> short-acting β <sub>2</sub> -agonists |                          |             |
| <sup>a</sup> The model was adjusted by all the variables shown in the table.                                                                                                                          |                          |             |
| <sup>b</sup> Low use: 0–2 SABA canisters/year; high use: ≥3 SABA canisters/year.                                                                                                                      |                          |             |

## Supplementary Figure legends

### **Fig. S1** Patient selection from CPRD

*BTS* British Thoracic Society, *CPRD* Clinical Practice Research Datalink, *HES* Hospital Episode Statistics, *QC* quality control

Index date is the first date the patient entered the cohort.

### **Fig. S2** Description of SABA inhaler use (canisters/year) according to BTS treatment step<sup>a</sup> (prescription analysis)

*BTS* British Thoracic Society, *ICS* inhaled corticosteroids, *SABA* short-acting  $\beta_2$ -agonists

<sup>a</sup>Step 1 = no ICS; step 2 = low-dose ICS; step 3 = low-dose ICS + long-acting  $\beta_2$ -agonist; step 4 = medium-dose ICS  $\pm$  additional therapies; step 5 = high-dose ICS  $\pm$  additional therapies.

**Appendix:** List of other steroid responsive diseases

| <b>Diagnostic code</b> | <b>Read term</b>                                |
|------------------------|-------------------------------------------------|
| J40..11                | Crohn's disease                                 |
| F20..00                | Multiple sclerosis                              |
| J410100                | Ulcerative colitis                              |
| N040.00                | Rheumatoid arthritis                            |
| G750.00                | Polyarteritis nodosa                            |
| J41..12                | Ulcerative colitis and/or proctitis             |
| J4...12                | Inflammatory bowel disease                      |
| F203.00                | Exacerbation of multiple sclerosis              |
| M145.00                | Pemphigoid                                      |
| M154100                | Discoid lupus erythematosus                     |
| G755100                | Temporal arteritis                              |
| H57y200                | Pulmonary sarcoidosis                           |
| AD5..00                | Sarcoidosis                                     |
| B680.00                | Acute leukemia NOS                              |
| M154.00                | Lupus erythematosus                             |
| N043.00                | Juvenile rheumatoid arthritis - Still's disease |
| B64..11                | Lymphatic leukemia                              |
| B68z.00                | Leukemia NOS                                    |
| B640.00                | Acute lymphoid leukemia                         |
| B650.00                | Acute myeloid leukemia                          |
| BBr..00                | [M]Leukaemias                                   |
| G754.00                | Wegener's granulomatosis                        |
| N003.00                | Dermatomyositis                                 |
| J41..00                | Idiopathic proctocolitis                        |
| B624.11                | Leukemic reticuloendotheliosis                  |
| D313.12                | Idiopathic thrombocytopenic purpura             |
| D313012                | ITP - idiopathic thrombocytopenic purpura       |
| N042200                | Rheumatoid nodule                               |
| 14C4.11                | H/O: ulcerative colitis                         |
| BBrA400                | [M]Hairy cell leukemia                          |
| BBr0100                | [M]Acute leukemia NOS                           |
| J401z11                | Crohn's colitis                                 |
| 14G1.00                | H/O: rheumatoid arthritis                       |
| J410.00                | Ulcerative proctocolitis                        |
| ZV7y100                | [V]Screening for rheumatoid arthritis           |
| N040P00                | Seronegative rheumatoid arthritis               |
| B65..00                | Myeloid leukemia                                |
| M154z00                | Lupus erythematosus NOS                         |
| N000.00                | Systemic lupus erythematosus                    |
| H58y300                | Interstitial lung disease NEC                   |
| J410300                | Ulcerative proctitis                            |

|         |                                                  |
|---------|--------------------------------------------------|
| N040T00 | Flare of rheumatoid arthritis                    |
| B641.00 | Chronic lymphoid leukemia                        |
| J400z00 | Crohn's disease of the small bowel NOS           |
| N047.00 | Seropositive erosive rheumatoid arthritis        |
| M145000 | Bullous pemphigoid                               |
| H570.00 | Rheumatoid lung                                  |
| G755.00 | Giant cell arteritis                             |
| B651.00 | Chronic myeloid leukemia                         |
| ZR3S.11 | CDAI - Crohn's disease activity index            |
| J40..00 | Regional enteritis - Crohn's disease             |
| ZR3S.00 | Crohn's disease activity index                   |
| N000400 | Systemic lupus erythematosus with pericarditis   |
| N04X.00 | Seropositive rheumatoid arthritis, unspecified   |
| BBr2000 | [M]Lymphoid leukemia NOS                         |
| D313000 | Idiopathic thrombocytopenic purpura              |
| N045300 | Juvenile arthritis in Crohn's disease            |
| 43b9.00 | Rheumatoid arthritis particle agglutination test |
| 43GD.00 | Lupus circulating anticoagulant index            |
| 43GE.00 | Lupus anticoagulant screen                       |
| J41z.00 | Idiopathic proctocolitis NOS                     |
| M144.00 | Pemphigus                                        |
| J402.00 | Regional ileocolitis                             |
| A170100 | Tuberculosis - lupus vulgaris                    |
| B681.00 | Chronic leukemia NOS                             |
| 68F1.00 | Rheumatoid arthritis screen                      |
| 1429    | H/O: * leukemia                                  |
| N031000 | Arthropathy in ulcerative colitis                |
| M145100 | Benign pemphigus NOS                             |
| M142.11 | Juvenile pemphigoid                              |
| N040Q00 | Rheumatoid bursitis                              |
| C152812 | Congenital adrenal hyperplasia NEC               |
| B64..00 | Lymphoid leukemia                                |
| 1J02.00 | Suspected leukemia                               |
| B660.00 | Acute monocytic leukemia                         |
| N000000 | Disseminated lupus erythematosus                 |
| B69..00 | Myelomonocytic leukemia                          |
| N031100 | Arthropathy in Crohn's disease                   |
| F20z.00 | Multiple sclerosis NOS                           |
| BBr2011 | [M]Lymphatic leukemia                            |
| J401z00 | Crohn's disease of the large bowel NOS           |
| N040200 | Rheumatoid arthritis of shoulder                 |
| N043200 | Pauciarticular juvenile rheumatoid arthritis     |
| B691.00 | Chronic myelomonocytic leukemia                  |
| BBr0111 | [M]Blast cell leukemia                           |



|         |                                                             |
|---------|-------------------------------------------------------------|
| K01x411 | Lupus nephritis                                             |
| J410400 | Exacerbation of ulcerative colitis                          |
| N041.00 | Felty's syndrome                                            |
| F202.00 | Generalized multiple sclerosis                              |
| N005.00 | Adult Still's Disease                                       |
| J41y.00 | Other idiopathic proctocolitis                              |
| J410200 | Ulcerative rectosigmoiditis                                 |
| B68..00 | Leukemia of unspecified cell type                           |
| M154700 | Subacute cutaneous lupus erythematosus                      |
| M144600 | Pemphigus vulgaris                                          |
| J63A.00 | Hepatic granulomas in sarcoidosis                           |
| B624.00 | Leukemic reticuloendotheliosis                              |
| B661.00 | Chronic monocytic leukemia                                  |
| B651z00 | Chronic myeloid leukemia NOS                                |
| N043z00 | Juvenile rheumatoid arthritis NOS                           |
| N04..00 | Rheumatoid arthritis and other inflammatory polyarthropathy |
| B65y100 | Acute promyelocytic leukemia                                |
| AD53.00 | Sarcoidosis of skin                                         |
| B641.11 | Chronic lymphatic leukemia                                  |
| J400200 | Crohn's disease of the terminal ileum                       |
| N04y012 | Fibrosing alveolitis associated with rheumatoid arthritis   |
| AD53000 | Lupus pernio                                                |
| BBr2700 | [M]Adult T-cell leukemia/lymphoma                           |
| N000300 | Systemic lupus erythematosus with organ or sys involv       |
| J08z900 | Orofacial Crohn's disease                                   |
| 333..00 | Sarcoid testing - Kveim                                     |
| K013.00 | Nephrotic syndrome with minimal change glomerulonephritis   |
| J411.00 | Ulcerative (chronic) enterocolitis                          |
| N040N00 | Rheumatoid vasculitis                                       |
| B67z.00 | Other specified leukemia NOS                                |
| 43c3.00 | Lupus anticoagulant screening test                          |
| N040S00 | Rheumatoid arthritis - multiple joint                       |
| F396400 | Myopathy due to rheumatoid arthritis                        |
| N045500 | Juvenile rheumatoid arthritis                               |
| H57y400 | Lung disease with systemic lupus erythematosus              |
| B64y100 | Prolymphocytic leukemia                                     |
| B651.11 | Chronic granulocytic leukemia                               |
| N04y000 | Rheumatoid lung                                             |
| BBr0300 | [M]Chronic leukemia NOS                                     |
| N04y200 | Adult-onset Still's disease                                 |
| M144300 | Foliaceous pemphigus                                        |
| N003000 | Juvenile dermatomyositis                                    |
| 2G27.00 | O/E-hands-rheumatoid spindling                              |
| B65z.00 | Myeloid leukemia NOS                                        |

|         |                                                                  |
|---------|------------------------------------------------------------------|
| M154000 | Lupus erythematosus chronicus                                    |
| J410z00 | Ulcerative proctocolitis NOS                                     |
| AD50.00 | Sarcoidosis of lung                                              |
| G5y7.00 | Sarcoid myocarditis                                              |
| 43mc.00 | Pemphigoid antibody level                                        |
| 43mb.00 | Pemphigus antibody level                                         |
| B68y.00 | Other leukemia of unspecified cell type                          |
| BBr6.00 | [M]Myeloid leukaemias                                            |
| B66..00 | Monocytic leukemia                                               |
| N043300 | Monarticular juvenile rheumatoid arthritis                       |
| ZV10600 | [V]Personal history of leukemia                                  |
| J400500 | Exacerbation of Crohn's disease of small intestine               |
| N000200 | Drug-induced systemic lupus erythematosus                        |
| B67..00 | Other specified leukemia                                         |
| BBr2100 | [M]Acute lymphoid leukemia                                       |
| N042z00 | Rheumatoid arthropathy + visceral/systemic involvement NOS       |
| B64y200 | Adult T-cell leukemia                                            |
| M146.00 | Benign mucous membrane pemphigoid                                |
| F4Cy100 | Ocular pemphigoid                                                |
| BBr6011 | [M]Granulocytic leukemia NOS                                     |
| 43ac.00 | Lupus inhibitor activity                                         |
| B64yz00 | Other lymphoid leukemia NOS                                      |
| B64z.00 | Lymphoid leukemia NOS                                            |
| J401200 | Exacerbation of Crohn's disease of large intestine               |
| B631.00 | Plasma cell leukemia                                             |
| J400400 | Crohn's disease of the ileum NOS                                 |
| M146011 | Cicatricial pemphigoid                                           |
| F200.00 | Multiple sclerosis of the brain stem                             |
| N003.11 | Poikilodermatomyositis                                           |
| BBr0.00 | [M]Leukaemias unspecified                                        |
| AD55.00 | Sarcoid arthropathy                                              |
| F374900 | Polyneuropathy in sarcoidosis                                    |
| M154200 | Lupus erythematosus migrans                                      |
| BBr2300 | [M]Chronic lymphoid leukemia                                     |
| BBr0000 | [M]Leukemia NOS                                                  |
| N040900 | Rheumatoid arthritis of proximal interphalangeal joint of finger |
| BBrz.00 | [M]Leukemia NOS                                                  |
| N040800 | Rheumatoid arthritis of metacarpophalangeal joint                |
| B670.00 | Acute erythraemia and erythroleukemia                            |
| N000z00 | Systemic lupus erythematosus NOS                                 |
| J412.00 | Ulcerative (chronic) ileocolitis                                 |
| J41yz00 | Other idiopathic proctocolitis NOS                               |
| 666B.00 | Multiple sclerosis multidisciplinary review                      |

|         |                                                              |
|---------|--------------------------------------------------------------|
| 43c6.00 | Rheumatoid arthritis screening test                          |
| G5yA.00 | Rheumatoid carditis                                          |
| F371000 | Polyneuropathy in disseminated lupus erythematosus           |
| N040100 | Other rheumatoid arthritis of spine                          |
| J401.00 | Regional enteritis of the large bowel                        |
| N040000 | Rheumatoid arthritis of cervical spine                       |
| M154500 | Lupus erythematosus tumidus                                  |
| 666A.00 | Multiple sclerosis review                                    |
| M146100 | Ocular pemphigoid                                            |
| ZRq9.00 | Systemic lupus erythematosus disease activity index          |
| BBr2500 | [M]Prolymphocytic leukemia                                   |
| M154400 | Lupus erythematosus profundus                                |
| BBr6700 | [M]Acute myelomonocytic leukemia                             |
| N042100 | Rheumatoid lung disease                                      |
| BBr4.00 | [M]Erythroleukemias                                          |
| G558300 | Sarcoid heart disease                                        |
| ZR21.11 | BILAG - British Isles lupus assessment group score           |
| F371100 | Polyneuropathy in polyarteritis nodosa                       |
| K01x400 | Nephrotic syndrome in systemic lupus erythematosus           |
| N233200 | Myositis in sarcoidosis                                      |
| N043100 | Acute polyarticular juvenile rheumatoid arthritis            |
| BBr6800 | [M]Chronic myelomonocytic leukemia                           |
| BBr2.00 | [M]Lymphoid leukemias                                        |
| 9kG..00 | Special service for patients with multiple sclerosis         |
| J410000 | Ulcerative ileocolitis                                       |
| N040700 | Rheumatoid arthritis of wrist                                |
| N040B00 | Rheumatoid arthritis of hip                                  |
| AD51.00 | Sarcoidosis of lymph nodes                                   |
| N042.00 | Other rheumatoid arthropathy + visceral/systemic involvement |
| M144200 | Erythematous pemphigus                                       |
| PH33111 | Benign familial chronic pemphigus                            |
| BBrA500 | [M]Acute megakaryoblastic leukemia                           |
| F013.00 | Meningitis due to sarcoidosis                                |
| B64y.00 | Other lymphoid leukemia                                      |
| G5y8.00 | Rheumatoid myocarditis                                       |
| 8CS1.00 | Multiple sclerosis care plan agreed                          |
| N043000 | Juvenile rheumatoid arthropathy unspecified                  |
| N040D00 | Rheumatoid arthritis of knee                                 |
| BBr2600 | [M]Burkitt's cell leukemia                                   |
| N040K00 | Rheumatoid arthritis of 1st metatarsophalangeal joint        |
| N040F00 | Rheumatoid arthritis of ankle                                |
| J400.00 | Regional enteritis of the small bowel                        |
| J40..12 | Granulomatous enteritis                                      |
| ZRq8.00 | Systemic lupus activity measure                              |

|         |                                                                |
|---------|----------------------------------------------------------------|
| J40z.00 | Regional enteritis NOS                                         |
| M144000 | Benign pemphigus                                               |
| F396500 | Myopathy due to sarcoidosis                                    |
| BBr6300 | [M]Chronic myeloid leukemia                                    |
| ZV67811 | [V]Follow-up examination after chemotherapy for leukemia       |
| N040R00 | Rheumatoid nodule                                              |
| Jyu4100 | [X]Other ulcerative colitis                                    |
| M144z00 | Pemphigus NOS                                                  |
| Nyu4100 | [X]Other giant cell arteritis                                  |
| Nyu4400 | [X]Other dermatomyositis                                       |
| BBr6100 | [M]Acute myeloid leukemia                                      |
| B682.00 | Subacute leukemia NOS                                          |
| F326300 | Multiple cranial nerve palsies in sarcoidosis                  |
| Nyu1G00 | [X]Seropositive rheumatoid arthritis, unspecified              |
| D40y400 | Leukemoid reaction                                             |
| N04y011 | Caplan's syndrome                                              |
| BBr6600 | [M]Acute promyelocytic leukemia                                |
| M144500 | Pemphigus vegetans                                             |
| B672.00 | Megakaryocytic leukemia                                        |
| BBr8.00 | [M]Eosinophilic leukemias                                      |
| F396300 | Myopathy due to polyarteritis nodosa                           |
| M146z00 | Benign mucous membrane pemphigoid NOS                          |
| M145z00 | Pemphigoid NOS                                                 |
| Nyu4300 | [X]Other forms of systemic lupus erythematosus                 |
| K01x300 | Nephrotic syndrome in polyarteritis nodosa                     |
| AD52.00 | Sarcoidosis of lung with sarcoidosis of lymph nodes            |
| N040500 | Rheumatoid arthritis of elbow                                  |
| BBr0z00 | [M]Leukemia unspecified, NOS                                   |
| J40z.11 | Crohn's disease NOS                                            |
| B690.00 | Acute myelomonocytic leukaemia                                 |
| ByuD600 | [X]Other myeloid leukaemia                                     |
| G75..00 | Polyarteritis nodosa and allied conditions                     |
| BBr6z00 | [M]Other myeloid leukaemia NOS                                 |
| F371200 | Polyneuropathy in rheumatoid arthritis                         |
| J401000 | Regional enteritis of the colon                                |
| J400100 | Regional enteritis of the jejunum                              |
| N040A00 | Rheumatoid arthritis of distal interphalangeal joint of finger |
| N040600 | Rheumatoid arthritis of distal radio-ulnar joint               |
| B652.00 | Subacute myeloid leukaemia                                     |
| BBr0113 | [M]Stem cell leukaemia                                         |
| M154600 | Lupus erythematosus unguium mutilans                           |
| BBr3.00 | [M]Plasma cell leukemias                                       |
| J401100 | Regional enteritis of the rectum                               |
| BBr0112 | [M]Blastic leukemia                                            |

|         |                                                           |
|---------|-----------------------------------------------------------|
| B624000 | Leukemic reticuloendotheliosis of unspecified sites       |
| B624300 | Leukemic reticuloend of intra-abdominal lymph nodes       |
| ByuD900 | [X]Other leukemia of unspecified cell type                |
| M154300 | Lupus erythematosus nodularis                             |
| B673.00 | Mast cell leukemia                                        |
| B672.11 | Thrombocytic leukemia                                     |
| B65yz00 | Other myeloid leukemia NOS                                |
| J400300 | Crohn's disease of the ileum unspecified                  |
| BBr6311 | [M]Naegeli-type monocytic leukemia                        |
| ByuD500 | [X]Other lymphoid leukemia                                |
| M144700 | Wildfire pemphigus                                        |
| A170000 | Tuberculosis - lupus exedens                              |
| B66..12 | Monoblastic leukemia                                      |
| G75z.00 | Polyarteritis nodosa and allied conditions NOS            |
| BBrA111 | [M]Thrombocytic leukemia                                  |
| F201.00 | Multiple sclerosis of the spinal cord                     |
| Jyu4000 | [X]Other Crohn's disease                                  |
| Myu1200 | [X]Other pemphigoid                                       |
| Nyu1200 | [X]Other specified rheumatoid arthritis                   |
| C152912 | Precocious puberty with adrenal hyperplasia               |
| N040H00 | Rheumatoid arthritis of talonavicular joint               |
| BBr4000 | [M]Erythroleukemia                                        |
| N045400 | Juvenile arthritis in ulcerative colitis                  |
| BBr8000 | [M]Eosinophilic leukemia                                  |
| N040J00 | Rheumatoid arthritis of other tarsal joint                |
| BBr6000 | [M]Myeloid leukemia NOS                                   |
| M146000 | Benign mucous membrane pemphigoid with no eye involvement |
| J400000 | Regional enteritis of the duodenum                        |
| BBr0200 | [M]Subacute leukemia NOS                                  |
| B67y000 | Lymphosarcoma cell leukemia                               |
| BBrA100 | [M]Megakaryocytic leukemia                                |
| BBr0400 | [M]Aleukaemic leukemia NOS                                |
| AD54.00 | Sarcoidosis of inferior turbinates                        |
| B642.00 | Subacute lymphoid leukemia                                |
| BBrA.00 | [M]Miscellaneous leukemias                                |
| BBr9000 | [M]Monocytic leukaemia NOS                                |
| Cyu0600 | [X]Sarcoidosis of other and combined sites                |
| N040G00 | Rheumatoid arthritis of subtalar joint                    |
| B624z00 | Leukemic reticuloendotheliosis NOS                        |
| 68E0.00 | Pemphigus/pemphigoid screening                            |
| B624.12 | Hairy cell leukemia                                       |
| ByuD800 | [X]Other specified leukemias                              |
| ByuD700 | [X]Other monocytic leukemia                               |
| B66z.00 | Monocytic leukemia NOS                                    |

|         |                                                             |
|---------|-------------------------------------------------------------|
| Nyu1100 | [X]Other seropositive rheumatoid arthritis                  |
| B67y.00 | Other and unspecified leukemia                              |
| ZV10611 | [V]Personal history of lymphoid leukemia                    |
| F4D3300 | Eyelid discoid lupus erythematosus                          |
| 8Cc2.00 | Management of multiple sclerosis in stable disability phase |
| F207.00 | Relapsing and remitting multiple sclerosis                  |
| F208.00 | Secondary progressive multiple sclerosis                    |
| F204.00 | Benign multiple sclerosis                                   |
| F206.00 | Primary progressive multiple sclerosis                      |
| Myu1000 | [X]Other pemphigus                                          |
| 8Cc1.00 | Management of multiple sclerosis in early disease phase     |
| 8Cc4.00 | Management of multiple sclerosis in palliative phase        |
| 8Cc0.00 | Management of multiple sclerosis in onset phase             |
| B66y.00 | Other monocytic leukemia                                    |
| B67yz00 | Other and unspecified leukemia NOS                          |
| N040L00 | Rheumatoid arthritis of lesser metatarsophalangeal joint    |
| N000500 | Neonatal lupus erythematosus                                |
| ZRVE.00 | Kurtzke multiple sclerosis rating scale                     |
| 38DZ.00 | Disease activity score in rheumatoid arthritis              |
| 8IAb.00 | Multiple sclerosis review declined                          |
| Myu7800 | [X]Other local lupus erythematosus                          |
| N040C00 | Rheumatoid arthritis of sacro-iliac joint                   |
| B651000 | Chronic eosinophilic leukemia                               |
| N040400 | Rheumatoid arthritis of acromioclavicular joint             |
| BBr4z00 | [M]Erythroleukaemia NOS                                     |
| N000600 | Cerebral lupus                                              |
| B662.00 | Subacute monocytic leukemia                                 |
| 7P20300 | Delivery of rehabilitation for rheumatoid arthritis         |
| B651200 | Chronic neutrophilic leukemia                               |
| B66yz00 | Other monocytic leukemia NOS                                |
| 8Hkv.00 | Referral to community multiple sclerosis team               |
| 42jG000 | Lupus insensitive activated partial thromboplastin time     |
| 38DZ000 | Disease activity score 28 joint in rheumatoid arthritis     |
| J413.00 | Ulcerative pancolitis                                       |
| B640000 | B-cell acute lymphoblastic leukemia                         |
| B641000 | B-cell chronic lymphocytic leukemia                         |
| B692.00 | Subacute myelomonocytic leukemia                            |
| B654.00 | Acute myeloblastic leukemia                                 |
| H58y700 | Interstitial lung disease due to connective tissue disease  |
| B64y500 | Adult T-cell lymphoma/leukemia (HTLV-1-associated)          |
| B693.00 | Juvenile myelomonocytic leukemia                            |
| 66HB000 | Rheumatoid arthritis annual review                          |
| B651100 | Chronic myeloid leukemia, BCR/ABL positive                  |
| ZRq8.11 | SLAM - Systemic lupus activity measure                      |

|                                                                                                |                                                              |
|------------------------------------------------------------------------------------------------|--------------------------------------------------------------|
| 9hR1.00                                                                                        | Except rheumatoid arthritis qual indicator: informed dissent |
| 9hR..00                                                                                        | Exception reporting: rheumatoid arthritis quality indicators |
| 9hR0.00                                                                                        | Except rheumatoid arthritis quality indicator: pt unsuitable |
| M144800                                                                                        | Drug-induced pemphigus                                       |
| BBr7000                                                                                        | [M]Basophilic leukemia                                       |
| 9mD..00                                                                                        | Multiple sclerosis monitoring administration                 |
| Nyu1000                                                                                        | [X]Rheumatoid arthritis+involvement/other organs or systems  |
| BBr6200                                                                                        | [M]Subacute myeloid leukemia                                 |
| B641200                                                                                        | Clinical stage B chronic lymphocytic leukemia                |
| B641011                                                                                        | Chronic lymphocytic leukemia of B-cell type                  |
| 8HTE500                                                                                        | Referral to rapid access temporal arteritis clinic           |
| B641100                                                                                        | Clinical stage A chronic lymphocytic leukemia                |
| N040M00                                                                                        | Rheumatoid arthritis of IP joint of toe                      |
| B641300                                                                                        | Clinical stage C chronic lymphocytic leukemia                |
| B651300                                                                                        | Atypical chronic myeloid leukemia, BCR/ABL negative          |
| 8Cc5.00                                                                                        | Management of inflammatory bowel disease                     |
| 9mM..00                                                                                        | Rheumatoid arthritis monitoring invitation                   |
| 1JA3.00                                                                                        | Suspected multiple sclerosis                                 |
| 9mM0.00                                                                                        | Rheumatoid arthritis monitoring invitation first letter      |
| 43GE100                                                                                        | Lupus anticoagulant positive                                 |
| 43GE000                                                                                        | Lupus anticoagulant negative                                 |
| 9mM1.00                                                                                        | Rheumatoid arthritis monitoring invitation second letter     |
| 9mM3.00                                                                                        | Rheumatoid arthritis monitoring verbal invitation            |
| B64y400                                                                                        | T-cell prolymphocytic leukemia                               |
| 9mM2.00                                                                                        | Rheumatoid arthritis monitoring invitation third letter      |
| BBr8z00                                                                                        | [M]Eosinophilic leukemia NOS                                 |
| N040E00                                                                                        | Rheumatoid arthritis of tibio-fibular joint                  |
| 9mM4.00                                                                                        | Rheumatoid arthritis monitoring telephone invitation         |
| N040300                                                                                        | Rheumatoid arthritis of sternoclavicular joint               |
| F396100                                                                                        | Myopathy due to disseminated lupus erythematosus             |
| BBrAz00                                                                                        | [M]Miscellaneous leukemia NOS                                |
| B663.00                                                                                        | Acute monoblastic leukemia                                   |
| B64y300                                                                                        | B-cell prolymphocytic leukemia                               |
| B66..11                                                                                        | Histiocytic leukemia                                         |
| BBr6900                                                                                        | [M]Juvenile myelomonocytic leukemia                          |
| 9mD0.00                                                                                        | Multiple sclerosis monitoring first letter                   |
| 9mD1.00                                                                                        | Multiple sclerosis monitoring second letter                  |
| H58y600                                                                                        | Interstitial lung disease due to collagen vascular disease   |
| ZV10613                                                                                        | [V]Personal history of myeloid leukaemia                     |
| 8Cc5.11                                                                                        | Management of inflammatory bowel disease                     |
| BBr3z00                                                                                        | [M]Plasma cell leukaemia NOS                                 |
| <b>H/O</b> history of, <b>NEC</b> not elsewhere classified, <b>NOS</b> not otherwise specified |                                                              |

Asthma patients in CPRD,  
April 1, 2007 to December 31, 2017

**N=709,268**

Excluded if, <12 years old, no 1-year data  
(QC and continuous CPRD) pre-index date,  
last asthma code >3 years pre-index date,  
BTS step 6 or not following BTS guidelines

**(n=134,355)**

Current asthma at index date,  
1-year data pre-index date,  
and  $\geq 12$  years old at index date

**n=574,913**

Statistical models – only HES  
linked data

**n=336,412**

**Prescription  
analysis**

**Outcomes  
cohort**



**Eligible patients**  
574,913

**BTS 1**  
195,311

**BTS 2**  
177,945

**BTS 3**  
62,897

**BTS 4**  
105,667

**BTS 5**  
33,093

|                                     |                                      |                                     |                                   |                                      |                                     |                                   |                                      |                                     |                                    |                                      |                                     |                                  |                                     |                                     |
|-------------------------------------|--------------------------------------|-------------------------------------|-----------------------------------|--------------------------------------|-------------------------------------|-----------------------------------|--------------------------------------|-------------------------------------|------------------------------------|--------------------------------------|-------------------------------------|----------------------------------|-------------------------------------|-------------------------------------|
| <b>0 SABA</b><br>109,305<br>(56.0%) | <b>1-2 SABA</b><br>61,695<br>(31.6%) | <b>≥3 SABA</b><br>24,311<br>(12.4%) | <b>0 SABA</b><br>17,108<br>(9.6%) | <b>1-2 SABA</b><br>83,324<br>(46.8%) | <b>≥3 SABA</b><br>77,513<br>(43.6%) | <b>0 SABA</b><br>8,561<br>(13.6%) | <b>1-2 SABA</b><br>20,572<br>(32.7%) | <b>≥3 SABA</b><br>33,764<br>(53.7%) | <b>0 SABA</b><br>13,552<br>(12.8%) | <b>1-2 SABA</b><br>31,986<br>(30.3%) | <b>≥3 SABA</b><br>60,129<br>(56.9%) | <b>0 SABA</b><br>3,234<br>(9.8%) | <b>1-2 SABA</b><br>7,211<br>(21.8%) | <b>≥3 SABA</b><br>22,648<br>(68.4%) |
|-------------------------------------|--------------------------------------|-------------------------------------|-----------------------------------|--------------------------------------|-------------------------------------|-----------------------------------|--------------------------------------|-------------------------------------|------------------------------------|--------------------------------------|-------------------------------------|----------------------------------|-------------------------------------|-------------------------------------|
